# Supplementary material for: Sterile seed germination and seedling cultivation of Idesia polycarpa
Source: PeerJ. 2025 May 7;13:e19395. doi: 10.7717/peerj.19395 (PMC12065453; doi:10.7717/peerj.19395)
Supplement: Supplemental Information 1 — The measured values of different treatments. These data are used for statistical analysis to compare the differences between different treatments. [file peerj-13-19395-s001.xlsx]

## Sheet: Table1
Table 1 Effect of different disinfection time on the seed disinfection of I. polycarpa by 0.1% HgCl2
0.1% HgCl2/min	Germination Rate /%	Pollution Rate /%
6	73	19
6	82	11
6	76	17
8	84	8
8	86	11
8	83	8
10	94	1
10	96	0
10	98	0
12	78	0
12	82	0
12	79	0

## Sheet: Table2
Table 2 Effects of different media on seed germination of I. polycarpa
Types of Medium	Germination Rate (%)	Seedling Height (cm)
1/2MS	94	4.5
1/2MS	93	4.3
1/2MS	97	3.8
MS	86	2.9
MS	91	3.1
MS	88	3.4
WPM	83	2.8
WPM	80	2.1
WPM	84	2.6

## Sheet: Table3
Table 3 Effects of different activated carbon concentrations on germination of I. polycarpa
Activated Carbon Concentrations (g·L−1)	Germination Rate (%)	Seedling Height (cm)
0	75	1.9
0	70	2
0	71	2.3
1	94	4
1	93	4.1
1	97	4.3
2	76	3.4
2	79	3.5
2	82	3.6
3	74	2.2
3	72	2.2
3	74	2

## Sheet: Table4
Table 4 Effects of different hormones and concentrations on germination of I. polycarpa
Tape of Hormone	Concentration (mg·L−1)	Germination Rate (%)	Seedling Height (cm)
0	0	77	2.8
	0	71	2.7
	0	72	3.3
GA3	0.5	91	3.2
	0.5	89	3.5
	0.5	87	3
	1	96	4
	1	95	4.1
	1	97	4.3
	1.5	88	3.6
	1.5	90	3.6
	1.5	88	3.7
	2	79	3.1
	2	80	2.9
	2	83	3.2
NAA	0.5	89	3.2
	0.5	84	3.5
	0.5	91	3.1
	1	80	3.3
	1	83	2.9
	1	85	3.3
	1.5	78	3.1
	1.5	80	2.8
	1.5	83	2.9
	2	74	2.7
	2	79	2.9
	2	80	2.8
6-BA	0.5	74	2.8
	0.5	80	2.9
	0.5	75	2.7
	1	81	2.9
	1	86	3.1
	1	80	3.6
	1.5	74	3.4
	1.5	74	3.2
	1.5	80	3.1
	2	77	2.8
	2	72	2.7
	2	73	3.5

## Sheet: Table5
Table 5 Effects of different sucrose concentrations on rooting of I. polycarpa
Treatment	Sucrose Concentrations (g·L−1)	Rooting Rate (%)	Root Length (cm)	Average Number of Roots (roots)	Average Root Length (cm)
1	10	95	43	15	2.66469
	10		90	18
	10		33	9
	10		42.5	20
	10		45.8	24
	10		26.5	12
	10		37	28
	10		24.5	12
	10		24	14
	10		23.5	15
	10		51.5	17
	10		22	9
	10		73.5	26
	10		39	14
	10		53	19
	10		23.5	9
	10		42.2	12
	10		109	33
	10		81	20
	10		13.5	11
2	20	95	45.5	17	2.49658
	20		16	8
	20		11.5	4
	20		13.5	8
	20		16	15
	20		4	3
	20		33.5	20
	20		36.5	21
	20		33.5	24
	20		77.5	11
	20		48	18
	20		11.5	4
	20		81	32
	20		52	14
	20		63.5	21
	20		21.5	8
	20		39	14
	20		33	11
	20		57	23
	20		35	16
3	30	85	38	15	2.38171
	30		12.5	7
	30		27.6	12
	30		25.5	13
	30		34.3	11
	30		37.5	11
	30		38	14
	30		11.5	11
	30		12	6
	30		16.5	8
	30		31	14
	30		21	10
	30		17	11
	30		56	24
	30		44.5	11
	30		29.5	10
	30		31	13
	30		37	14
	30		19.5	10
	30		46	21

## Sheet: Table6
Table 6 Effects of different auxins and their concentrations on rooting of I. polycarpa
Auxins Concentrations			IBA Auxins Concentrations															IAA Auxins Concentrations															IAA Auxins Concentrations
Average Root Length (cm)	Average Number of Roots (roots)	Rooting Rate (%)	Average Root Length (cm)	Average Number of Roots (roots)	Rooting Rate (%)	Average Root Length (cm)	Average Number of Roots (roots)	Rooting Rate (%)	Average Root Length (cm)	Average Number of Roots (roots)	Rooting Rate (%)	Average Root Length (cm)	Average Number of Roots (roots)	Rooting Rate (%)	Average Root Length (cm)	Average Number of Roots (roots)	Rooting Rate (%)	Average Root Length (cm)	Average Number of Roots (roots)	Rooting Rate (%)	Average Root Length (cm)	Average Number of Roots (roots)	Rooting Rate (%)	Average Root Length (cm)	Average Number of Roots (roots)	Rooting Rate (%)	Average Root Length (cm)	Average Number of Roots (roots)	Rooting Rate (%)	Average Root Length (cm)	Average Number of Roots (roots)	Rooting Rate (%)	Average Root Length (cm)	Average Number of Roots (roots)	Rooting Rate (%)	Average Root Length (cm)	Average Number of Roots (roots)	Rooting Rate (%)	Average Root Length (cm)	Average Number of Roots (roots)	Rooting Rate (%)	Average Root Length (cm)	Average Number of Roots (roots)	Rooting Rate (%)	Average Root Length (cm)	Average Number of Roots (roots)	Rooting Rate (%)
0.0(mg·L−1)			0.1(mg·L−1)			0.3(mg·L−1)			0.5(mg·L−1)			0.7(mg·L−1)			0.9(mg·L−1)			0.05(mg·L−1)			0.1(mg·L−1)			0.5(mg·L−1)			1.0(mg·L−1)			1.5(mg·L−1)			0.01(mg·L−1)			0.05(mg·L−1)			0.1(mg·L−1)			0.5(mg·L−1)			1.0(mg·L−1)
3	2	40	31.5	17	89	9	4	87	27.5	11	95	57	19	98	42.5	18	91	11	6	83	30.5	20	90	29.5	15	91	31	16	93	19	8	85	19.5	11	72	19	6	96	8.5	7	85	3	2	86	36	16	82
2	2		13	7		57	20		22.5	7		35	15		16.5	4		6	3		11.5	5		16	8		15.5	4		4.5	4		2	2		15	11		38	19		28.5	16		2	2
0	0		4	2		26	13		28	12		34	15		55.5	20		31.5	19		3.5	1		23	11		17	9		8	2		25.5	15		8	3		23.5	10		61	33		51.5	27
0	0		11.5	5		6.5	3		56	21		63	14		19.5	7		9.5	4		11	4		19.5	9		28.5	6		36	20		4	4		19.5	13		17	7		14.5	5		3	3
0	0		5	2		18	6		36.5	13		42.5	9		25.5	10		7.5	3		8	4		12	5		19.5	10		7	2		19	7		49	23		24	12		26.5	11		21	9
6	6		37.5	19		12	3		35	9		52.5	20		59	21		15.5	8		8.5	7		15	12		14.5	8		10	5		13.5	8		25.5	10		21.5	12		27.5	14		23	8
4	2		2	2		20.5	9		38	11		44	12		47.5	17		8	4		14	6		16.5	6		18	12		42.5	23		3	3		21	11		12	4		2	1		2	2
0	0		19	11		15.5	7		41	14		39	8		30	12		15.5	8		8.5	3		19	7		26.5	17		6	2		6	3		32	14		40.5	22		32	13		6	3
0	0		15	7		16	6		33.5	13		38.5	11		31	13		13	8		20	11		13.5	5		12.5	7		15	4		5	4		13.5	10		26.5	9		21	9		6	4
0	0		13.5	6		9	4		15	6		31	9		12.5	3		11	5		9.5	2		11.5	5		31.5	13		4	1		16	11		62	24		12	11		3	2		33	19
4	3	30	10	3	87	12	5	89	19.5	8	93	27	12	96	44	18	95	27	12	81	5.5	5	85	18.5	10	87	20	10	92	9	3	83	10.5	7	70	12.5	7	93	4	1	86	27	13	81	10.5	9	80
2	4		15.5	5		14	6		31	12		38.5	14		12	3		6.5	3		12	7		16	6		15.5	6		4	1		14.5	9		38	17		61.5	25		9.5	3		15	9
0	0		20.5	9		21.5	11		21	9		46.5	16		41	15		11.5	8		8.5	4		19	7		20	13		12	6		9	6		31.5	18		38	13		17	9		17	10
0	0		4	4		32.5	16		38	12		40	10		56	21		12.5	3		28	15		12.5	4		8	3		11.5	5		10	5		18.5	5		38.5	13		49	25		8	6
0	0		11	7		12	4		27	11		27	8		19.5	6		13	2		25	14		13	5		38.5	26		7.5	5		11	6		51.5	22		19.5	9		6	2		16	6
0	0		21	11		3	3		19.5	8		32	9		25	8		9	5		4	1		21	10		111	19		36	18		21.5	13		49	24		2	2		9	4		48	24
5	5		15	8		10.5	5		45	11		35.5	9		50	19		12	6		22.5	11		13.5	5		9	4		29	16		6	3		19	7		60.5	29		13	5		5.5	3
0	0		21.5	10		20	8		26.5	12		79	19		63	19		13.5	9		17	9		33	18		13.5	6		23	7		9.5	6		19.5	10		3	3		31.5	17		9.5	6
0	0		23.5	13		28.5	10		33	9		39.5	15		6.5	2		11.5	6		17	10		11.5	5		19	7		17	10		22	12		16	3		28.5	20		28.5	15		31	19
0	0		18.5	9		23.5	11		60	24		47	19		43.5	15		9	9		16	7		14.5	9		16.5	9		15	7		10	7		23	11		7	2		24.5	11		12.5	7
4	3	30	11.5	9	86	11.5	6	87	18.5	5	97	19	5	96	23	9	94	10	6	80	8	5	80	15.5	4	90	19.5	10	91	17.5	7	81	4	3	74	45.5	18	93	14.15	11	83	42.5	26	83	3.5	3	85
2	3		23	10		14.5	7		20	7		96	25		52	20		3	3		12	7		10.5	7		23	14		9.5	4		2	2		52.5	26		24	13		36.5	21		6	5
0	0		1	1		23.5	10		25	10		42	12		29.5	11		13.5	7		12	4		36	18		21.5	9		49	27		9	5		45.5	18		1	1		5.5	2		53.5	29
0	0		20.5	11		22	7		56.5	24		13	4		6	2		14.5	8		18.5	9		20.5	10		23	6		31.5	19		19.5	11		12	3		26.5	14		26.5	13		9	5
0	0		14	7		10.5	4		41	13		44	14		35.5	11		8.5	5		26.5	14		6.5	2		32.5	14		11	3		18	9		26	13		7	4		30	14		57.5	26
0	0		8	3		22.5	13		33	9		47	16		40	14		14	9		4	2		9	4		49.5	9		12	4		10	6		42	25		69	30		3	1		6	6
2.5	5		28	11		24	11		14	5		67.5	18		28	10		8	3		15.5	8		8	4		12	5		9	4		5	5		4.5	2		71	30		26	17		55	27
0	0		16.5	10		15	7		48.5	22		43	15		52	18		3	3		15	9		9.5	6		14	6		14.5	7		4.5	5		56	19		13.5	7		3	1		3.5	5
0	0		2	1		4	4		28	9		36	19		22	9		31	16		14.5	6		23	14		33	20		7	3		26	15		16	8		7.5	3		12.5	8		5	5
0	0		26	13		33	14		26	9		55	14		74	21		29	14		13	7		28	15		27	13		14	6		3	3		8	3		2	2		27.5	16		2	2

## Sheet: Table7
Table 7 Effect of different proportions of IBA and NAA on rooting of I. polycarpa
T1			T2			T3			T4			T5			T6			T7			T8			T9
Average Root Length (cm)	Average Number of Roots (roots)	Rooting Rate (%)	Average Root Length (cm)	Average Number of Roots (roots)	Rooting Rate (%)	Average Root Length (cm)	Average Number of Roots (roots)	Rooting Rate (%)	Average Root Length (cm)	Average Number of Roots (roots)	Rooting Rate (%)	Average Root Length (cm)	Average Number of Roots (roots)	Rooting Rate (%)	Average Root Length (cm)	Average Number of Roots (roots)	Rooting Rate (%)	Average Root Length (cm)	Average Number of Roots (roots)	Rooting Rate (%)	Average Root Length (cm)	Average Number of Roots (roots)	Rooting Rate (%)	Average Root Length (cm)	Average Number of Roots (roots)	Rooting Rate (%)
16.5	10	91	46.5	25	97	68.5	24	74	12	7	85	74	33	89	80.5	41	100	81.5	31	96	14	7	92	33.5	17	90
11	7		40	19		34	15		22	13		26	10		35	16		29.5	12		79.5	40		39.5	19
33	21		38	18		10	4		47	8		24	11		91	5		97	49		77	29		20	10
30.5	20		2	2		46	21		14	7		13.5	7		36	13		26	9		14	4		41	13
31	7		30	15		27	11		5	5		27	12		108	46		29	13		6	3		34.5	16
31.5	16		42.5	21		39	19		23	9		24	9		93	32		17	9		57	17		56	25
20	9		10	5		85	33		24	12		31.5	13		41	17		47.5	20		24	10		39.5	19
4	4		24	12		38	21		18	9		125.5	40		131	31		40.5	16		21	11		5	5
5	5		61.5	33		87.5	29		40.5	17		20	8		38	12		26	10		41	15		18	9
30.5	19		16	9		10	5		51	21		36	17		30.5	14		27	12		37	14		42	21
40.5	21	91	25	9	97	34	14	71	51	14	83	53	18	90	46.5	18	100	23	10	96	75	24	91	39	13	91
12	5		64	17		10	5		8	4		58	17		46	15		38.5	16		74	22		36	17
27	13		22	12		31	13		3	3		50	15		41	10		98	22		32	13		3	3
18	8		60	28		136	60		22.5	10		78.5	25		86.5	19		19	8		12	8		41	16
4	4		39.5	19		30	12		14	6		16	8		167	41		62	26		57.5	33		36.5	19
18	7		17	11		15	6		6	3		16	8		28	7		39	15		20	10		55.5	24
12.5	7		35.5	14		32	13		66	27		38	17		136	36		75.5	29		15	8		44	21
26	10		8	4		16	6		48.5	17		22	8		34.5	12		27	12		19	8		31.5	12
8	5		16	9		25	10		34	16		12	4		37	14		22	8		26	9		36.5	15
10.5	8		44.5	20		42	15		41	22		91	31		26	12		66	26		27	11		18	2
23	10	89	4	4	96	23	9	72	48	22	82	22	8	90	37.5	8	100	41	19	94	45	16	90	26	11	91
31	11		35.5	13		40	14		54	26		15	8		22	8		74	26		12	5		17	8
19.5	9		2	2		43	18		33.5	21		94	47		158.5	56		31.5	10		66	39		26	10
12	8		66	28		49.5	15		3	3		14.5	19		250	62		51	23		79.5	34		18	8
10	10		49	12		18	6		33	17		68	22		52	17		37.5	24		42	14		11	3
16.5	8		55	20		76.5	30		40.5	20		74	26		96.5	23		42	16		16	8		41	23
3	3		38.5	15		48	19		12.5	8		93	29		90	21		78.5	35		73.5	27		74	29
24.5	13		26.5	14		36	17		54	25		15	3		56.5	19		52	17		30	11		45.5	26
14	6		30	14		74	31		15	7		49.5	17		88	22		21.5	8		51.5	24		12	6
30	11		28	17		47.5	17		20	9		51	20		85	18		43	19		16	6		26	11

## Sheet: Table8
Table 8 Effects of different substrate ratios on the growth of I. polycarpa seedlings
Treatment	Substrate Ratio (V：V：V)	Transplanting Survival Rate (%)	Growth Status (30 d)
A1	Organic soil: perlite: vermiculite =1:1:1	85	Plants grow well; leaves slightly yellow
		95
		90
A2	Organic soil: perlite: vermiculite =2:1:1	100	Plants grow well, robust, and fast; leaves are light green
		95
		95
A3	Organic soil: perlite: vermiculite =1:2:1	85	Plants grow slowly; leaves are green
		85
		90

## Sheet: Table9
Table 9 Effects of different containers on the growth of I. polycarpa seedlings
Tape of Container	Day of Transplantation (d)	Transplanting Survival Rate (%)	Seedling Height (cm)	Ground Diameter (mm)	Number of Leaf	Growth Status
transparent plastic cups	10	—	11.9	1.12	6	Plant grew rapidly from 20 to 30 days; leaves were large and bright green; roots were developed
			12.2	0.88	8
			8.5	1.08	7
			12	1.17	5
			7.8	1.31	6
			11.1	1.29	6
			11.2	1	6
			12.5	1.01	7
			10.5	0.94	9
			8	0.91	6
	20	—	17.9	3.05	10
			18.2	2.05	7
			13.3	1.58	6
			15.8	1.91	9
			14.7	2.29	6
			19.5	2.34	7
			18.7	2.36	8
			15.6	1.81	8
			13.1	2.37	11
			12.5	2.46	8
	25	95	21.6	3.59	12
			19.4	3.06	10
			16.2	2.01	7
		95	20.9	3.67	9
			19.5	2.8	7
			26.3	2.92	8
			19.2	2.57	11
		100	20.6	2.75	10
			23.7	3.12	8
			16.1	3.05	11
growing hole trays	10	—	6	0.93	9	Plants grew slowly; some leaves appeared yellowish and fell off; growth is weak
			9	1.11	6
			6.8	0.97	6
			10.9	1.12	7
			7.2	0.9	7
			8.5	1.33	4
			8.1	0.91	7
			7.8	1.09	4
			11.1	1.32	7
			9.3	0.85	6
	20	—	9.8	1.44	9
			10.4	1.51	8
			10.1	1.44	6
			12.9	1.514	9
			7.8	1.39	8
			10.3	1.75	5
			8.7	1.22	7
			15.8	1.77	6
			11.3	1.63	7
			9.7	1.2	6
	25	75	11.8	1.95	11
			14.1	2.01	9
			12.2	1.89	7
		70	14.6	1.97	10
			8	1.65	6
			11.5	2.13	9
			10.6	1.53	7
		75	18.3	2.04	8
			15	2.16	8
			13.6	1.39	7
